# Supplementary material for: CRISPR Ribonucleoprotein-Mediated Precise Editing of Multiple Genes in Porcine Fibroblasts
Source: MDPI journal article supplement (doi:10.3390/ani14040650), 2024-02-18
Supplement: s1 [file s1]

Supplementary Table 1. sgRNA Target Sites

| Gene Name  | sgRNA sequence (5'-3') | PAM Sequence |
|------------|------------------------|--------------|
| INS        | CACGCCCAAGGCCCGTCGGG   | AGG          |
| RLN3 Exon1 | GCCGCAAAGCTTCACTCCAT   | AGG          |
| RLN3 Exon2 | ACTTGCAGCAGTTGCTGGAG   | AGG          |
