# Supplementary material for: CRISPR Ribonucleoprotein-Mediated Precise Editing of Multiple Genes in Porcine Fibroblasts
Source: MDPI journal article supplement (doi:10.3390/ani14040650), 2024-02-18
Supplement: s1 [file s1]

Supplementary Table 3. Primer Sequence for PCR

| Primer Name | Primer sequence(5'-3')  | Gene       | Product |
|-------------|-------------------------|------------|---------|
| RLN3-E1F    | CAACCATCAGAAAGCTGCCTTG  | RLN3 Exon1 | 607bp   |
| RLN3-E1R    | CATTACCTCCCCAGCCTCACC   |            |         |
| RLN3-E2F    | GCAATGGCCTCCAGCGAAT     | RLN3 Exon1 | 553bp   |
| RLN3-E2R    | GCCCACCTGGACACCCAT      |            |         |
| INS-F       | CCGGCCCAGGCCTTCGTGAACCA | INS Exon   | 592bp   |
| INS-R       | GGCTTCTCGAGCGGGACCGGG   |            |         |
