# Supplementary material for: CRISPR Ribonucleoprotein-Mediated Precise Editing of Multiple Genes in Porcine Fibroblasts
Source: MDPI journal article supplement (doi:10.3390/ani14040650), 2024-02-18
Supplement: s1 [file s1]

Supplementary Table 2. ssODN synthesized in this paper

| Gene (Architecture) | Sequence(5' ->3')                                                                                                                   |
|---------------------|-------------------------------------------------------------------------------------------------------------------------------------|
| INS                 | ACGCCCCCTCGGCTCACCTGAGGGTTCTCCGCCTCCCGACGCGTCTTGG<br>GCGTGTAGAAGAAGCCGCGCTCCCCGCACACCAGGTACAGCGCCTCCAC<br>CAGGTGGGAGCCGCACA         |
| RLN3 Exon1-         | TGCTGGCTGGGGAGCTGTGGCTGAGGACTGAGGCCCGGGCGGCGCCATA<br>TGGAGTGAGGCTTTGCGGCCGTGAATTCATCCGAGCGGTCATCTTTACCT<br>GCGGGGGCTCCCGGTGGAGA     |
| RLN3 Exon2          | TGGGGCTCTTAGGGGCAGTCGTGATGTCCTGGCTGGCTTATCCAGCTCGT<br>GCTGCAAGTGGGGGTGCAGCAAGAGTGAAATCAGCAGCCTCTGCTAGAC<br>AGGGGACCAGGTGGCCATGGAGAA |
